# Supplementary material for: Intrinsic Dependence of Groundwater Cation Hydraulic and Concentration Features on Negatively Charged Thin Composite Nanofiltration Membrane Rejection and Permeation Behavior
Source: MDPI journal article supplement (doi:10.3390/membranes12010079), 2022-01-10
Supplement: s1 [file s1]

**a****SPI vs.  $S_D$** 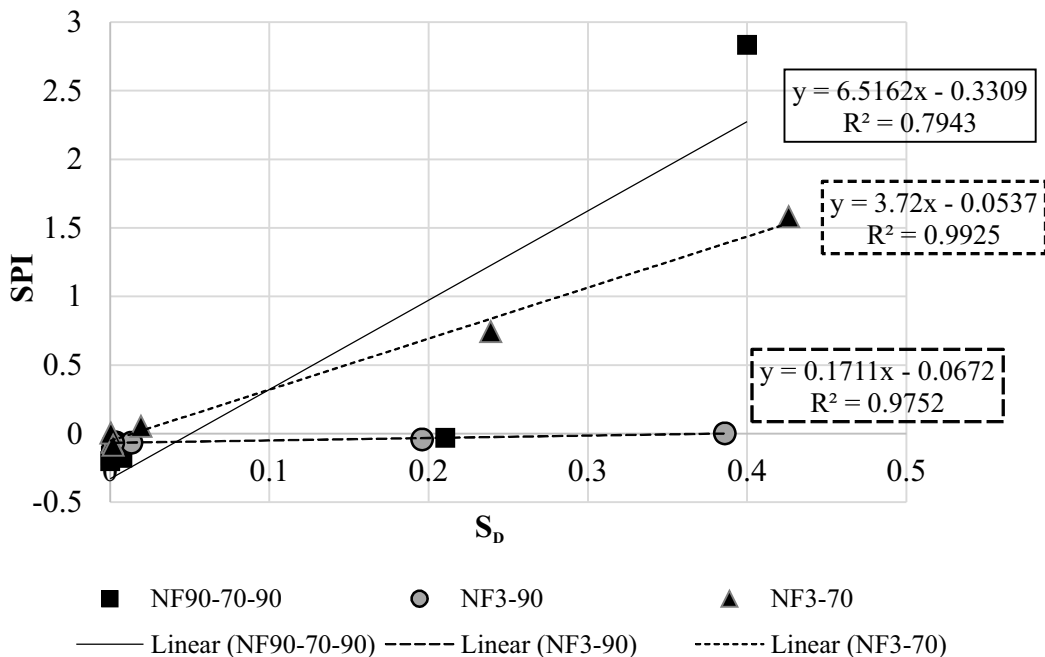**b****SPI vs.  $S_F$** 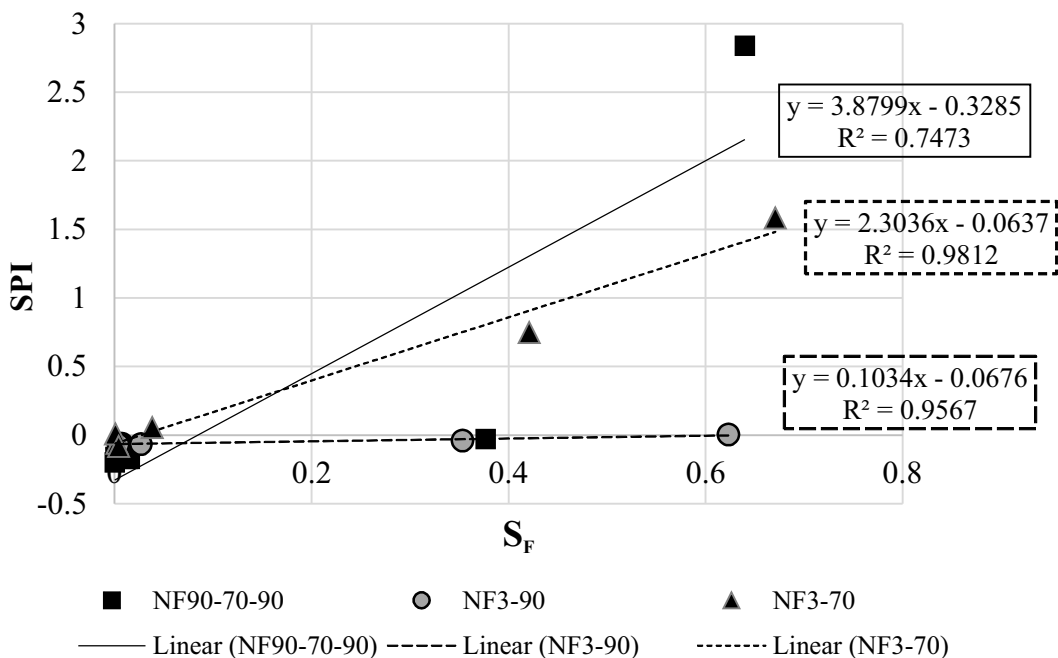**Figure S1.** Linear correlation of solute permeability indicator vs. steric hindrance factors for diffusion (a) and convection (b)
